# Supplementary material for: A novel strategy for dramatically improving catalytic performance for light-driven thermocatalytic CO2 reduction with CH4 on Ru/MgO: the CO2 molecular fencing effect promoted by photoactivation
Source: Royal Society of Chemistry journal article supplement (doi:10.1039/d3ta04267g), 2023-01-01
Supplement: d3ta04267g1.pdf [file d3ta04267g1.pdf]

### Supporting Information

**A novel strategy of dramatically improving catalytic performance for light-driven thermocatalytic CO<sub>2</sub> reduction with CH<sub>4</sub> on Ru/MgO: CO<sub>2</sub> molecular fencing effect promoted by photoactivation**

*Huamin Cao, Yuanzhi Li,\* Qianqian Hu, Jichun Wu, Lei Ji*

State Key Laboratory of Silicate Materials for Architectures, Wuhan University of Technology, 122 Luoshi Road, Wuhan 430070, P. R. China.

Email: [liyuanzhi@whut.edu.cn](mailto:liyuanzhi@whut.edu.cn)

### Contents

Supplementary Methods

*Experimental*

1. *Characterization*
2. *Photothermocatalytic or photocatalytic tests*
3. *Thermocatalytic measurements*
4. *Temperature programmed desorption of CO<sub>2</sub> (CO<sub>2</sub>-TPD)*
5. *Isotope labeling*
6. *Controlled catalytic tests*
7. *CH<sub>4</sub> temperature programmed oxidation by pre-adsorbed CO<sub>2</sub> (CH<sub>4</sub>-TPO-CO<sub>2</sub>)*

Supplementary Scheme S1-3

Supplementary Figure S1-13

Supplementary Table S1

## Experimental

### 1. Characterization

XRD patterns of the samples of Ru/MgO and Ru/SiO<sub>2</sub> were obtained on a RigakuDmax X-ray diffractometer. The composition of the samples was determined on an inductively coupled plasma/optical emission spectroscopy (ICP-OES, Optima 4300DV, PerkinElmer). TEM images and High-angle annular dark-field images were obtained on a JEM-ARM200F electron microscope. XPS spectra were recorded on an X-ray photoelectron spectrometer (ESCALAB 250Xi) using Mg K $\alpha$  radiation. BET surface area and pore volume of the samples were measured on an ASAP2020 physisorption instrument by N<sub>2</sub> adsorption at -196 °C. CO<sub>2</sub> adsorption isotherms and CO<sub>2</sub> adsorption capacities of the samples were measured at 0 °C (ice water) on an ASAP2020 physisorption instrument. Thermogravimetric/mass spectrometry (TG-MS) analysis was performed on a STA449F3 thermal analyser linked with a QMS403 mass spectrometer. Fourier transform infrared (FTIR) spectra were obtained on an infrared spectrometer (Nicolet 6700). Diffuse reflectance absorption spectra were obtained on a UV3600 spectrophotometer. The Raman spectra were obtained on the LABRAN HR Evolution with excitation of light source at 532 nm.

### 2. Photothermocatalytic or photocatalytic tests

The photothermocatalytic or photocatalytic CO<sub>2</sub> reduction by CH<sub>4</sub> on the samples with the focused illumination from a 500 W Xe lamp was conducted on a home-made stainless steel reactor with a quartz window (*Scheme S1 for review only*).<sup>[40, 46, 50]</sup> A gas stream of 30/30/40 vol% CH<sub>4</sub>/CO<sub>2</sub>/Ar, regulated by a mass flow meter (S49-31/MT), flows continuously at 90 mL min<sup>-1</sup> into the reactor containing 0.01 g of sample. The flow rate was accurately measured by soap bubble meter. To conduct the photothermocatalytic CO<sub>2</sub> reduction by CH<sub>4</sub> on samples with focused vis-IR illumination,  $\lambda > 420$ , 560 and 690 nm long-wave pass filter was placed in the front of the reactor quartz window. The power of the focused UV-vis-IR illumination was 5751.0 mW. The spot size of focused illumination, adjusted by a convex lens equipped on the Xe lamp, was about 10 mm. Thus, the intensity of the focused UV-vis-IR illumination was 73.2 kW m<sup>-2</sup> (corresponding to a solar flux concentration ratio of 73.2). The power values of the  $\lambda > 420$ , 560 and 690 nm focused vis-IR illumination were 4825.9, 4183.0 and 3322.7 mW, respectively. Their corresponding intensities of the focused UV-vis-IR illumination were 61.4, 53.3 and 42.3 kW m<sup>-2</sup>, respectively. The concentration of the reactants and products was analyzed by a GC-9560 gas chromatograph (GC). The procedures of photothermocatalytic tests, the focused

illumination power measurement, the surface temperature measurement of the samples under the focused irradiation, light-to-fuel efficiency calculation, and GC analysis were detailed in the previous publications.<sup>[40, 46, 50]</sup>

For conducting photocatalytic DRM on Ru/MgO under focused UV-vis-IR illumination, 0.01 g of the Ru/MgO sample was directly put on the stainless steel bottom of the reactor. The reactor was put in an ice-water bath to keep the photocatalytic reaction at near room temperature.

The thermodynamic maximum  $\eta_{\max}$  value of the reaction system is determined by the solar absorption and Carnot efficiencies according to the following equation.<sup>[40, 46, 50]</sup>

$$\eta_{\max} = [1 - \sigma \times T_H^4 / (I_{\text{DNI}} \times C)] \times [1 - T_L / T_H]$$

Where  $\sigma$  is Stefan–Boltzmann constant,  $I_{\text{DNI}}$  is the direct normal solar illumination (1 kW m<sup>-2</sup>),  $C$  is the concentration ratio of solar flux,  $T_H$  and  $T_L$  are the high and low temperatures of the equal Carnot heat engine.

In the present case,  $C$  is equal to 73.2, upon focused UV-vis-IR illumination, the surface temperature of Ru/MgO was quickly elevated from room temperature ( $T_L = 25$  °C) to an equilibrium temperature ( $T_H = 490$  °C). The  $\eta_{\max}$  value is calculated to be 44.9%.

### 3. Thermocatalytic measurements

The thermocatalysis of the sample for DRM was measured under steady state in a flow fixed quartz tube reactor (with an inner diameter of 8 mm and a length of 300 mm) on a WFS-2015 online gas-phase reaction apparatus. 0.01 g of the Ru<sub>2</sub>O<sub>3</sub>/MgO or Ru<sub>2</sub>O<sub>3</sub>/SiO<sub>2</sub> was put in the middle of the quartz reactor supported by quartz wool. A thermocouple in close contact with the catalyst sample is placed inside the reactor to measure the reaction temperature. The reactor was placed in a tubular electrical oven to control the reaction temperature. A reducing gas of 5 vol% H<sub>2</sub>/Ar constantly flowed at a flow rate of 30 mL min<sup>-1</sup>, as controlled by a gas mass flow meter (D08-1F). The catalyst sample was heated at 10 °C min<sup>-1</sup> to 700 °C and kept for 1 h. Then the atmosphere was switched to the feed stream of 30/30/40 vol% CH<sub>4</sub>/CO<sub>2</sub>/Ar as balance gas, flowed at a flow rate of 90 mL min<sup>-1</sup>. The reaction temperature was controlled at 490, 484 or 462 °C. Products and reactants are analyzed by gas chromatograph (GC9560).

### 4. Temperature programmed desorption of CO<sub>2</sub> (CO<sub>2</sub>-TPD)

CO<sub>2</sub>-TPD on the Ru/MgO or Ru/SiO<sub>2</sub> sample in the dark were conducted on a multifunctional adsorption apparatus (TP-5080) by using a quartz window. 0.12 g of Ru<sub>2</sub>O<sub>3</sub>/MgO or Ru<sub>2</sub>O<sub>3</sub>/SiO<sub>2</sub> was

heated at  $10\text{ }^{\circ}\text{C min}^{-1}$  to  $700\text{ }^{\circ}\text{C}$ , and kept at  $700\text{ }^{\circ}\text{C}$  for 30 min in a flow of 5 vol%  $\text{H}_2/\text{Ar}$  ( $24\text{ mL min}^{-1}$ ) purified by a tube of deoxidant. After being cooled to room temperature, the obtained Ru/MgO or Ru/SiO<sub>2</sub> samples were heated to  $400\text{ }^{\circ}\text{C}$  at  $10\text{ }^{\circ}\text{C min}^{-1}$ , and kept at  $400\text{ }^{\circ}\text{C}$  for 1 h in a flow of high purity helium ( $24\text{ mL min}^{-1}$ , purified by a tube of deoxidant) to remove the adsorbed  $\text{H}_2$ . After being cooled to room temperature, the fed gas was switched to 10 vol%  $\text{CO}_2/\text{He}$  ( $24\text{ mL min}^{-1}$ ) for  $\text{CO}_2$  adsorption. After  $\text{CO}_2$  adsorption for 0.5 h, the Ru/MgO or Ru/SiO<sub>2</sub> sample with pre-adsorbed  $\text{CO}_2$  was heated at  $10\text{ }^{\circ}\text{C min}^{-1}$  in a flow of high purity helium ( $24\text{ mL min}^{-1}$ ) purified by a tube of deoxidant.

## 5. Isotope labeling

Isotope labeling experiments on the Ru/MgO or Ru/SiO<sub>2</sub> with concentrated UV-vis-IR illumination were conducted in a home-made quartz funnel-like reactor (with heating device) (*Supplementary Scheme 3*) which was linked via micro pump to a tubular FTIR cell placed in the chamber of an infrared spectrometer (Nicolet 6700). 0.01 g of Ru/MgO or Ru/SiO<sub>2</sub> was placed in the reactor. The temperature of the sample was measured by a thermocouple which was closely contacted to the sample (*Supplementary Scheme 3*). The sample was heated to  $500\text{ }^{\circ}\text{C}$  at  $10\text{ }^{\circ}\text{C min}^{-1}$  and kept at  $500\text{ }^{\circ}\text{C}$  for pre-reduction of the sample for 30 min in a flow of 5 vol%  $\text{H}_2/\text{Ar}$  ( $50\text{ mL min}^{-1}$ ) purified by a tube of deoxidant. After cooling to  $400\text{ }^{\circ}\text{C}$ , the flow was switched to a flow of high purity argon ( $50\text{ mL min}^{-1}$ , purified by a tube of deoxidant) for removing  $\text{H}_2$  adsorbed on the sample for 1 h at  $400\text{ }^{\circ}\text{C}$ . Then, the pretreated samples were cooled to ambient temperature. After sample pretreatment, argon was turned off and charged with a mixture of 10 mL  $\text{C}^{18}\text{O}_2$  and 290 mL argon in a recirculating closed gas circuit and adsorbed for 30 min. Then switch to a high-purity argon gas stream ( $50\text{ mL min}^{-1}$ , purified by a tube of deoxidant), heat to  $650\text{ }^{\circ}\text{C}$  at  $10\text{ }^{\circ}\text{C min}^{-1}$  and continue heating to remove free and physically adsorbed  $\text{C}^{18}\text{O}_2$  until  $\text{C}^{18}\text{O}_2$  is not detected by FTIR. The high-purity argon stream is turned off and the micro-pump is turned on, and a mixture of 10 mL  $\text{C}^{16}\text{O}_2$ , 20 mL  $\text{CH}_4$  and 270 mL argon is charged into the circulating closed gas circuit and circulated through the system. A concentrated UV-vis-IR illumination was applied to the sample surface. FTIR spectra were recorded for the gas composition in the system.

## 6. Controlled catalytic tests

Catalytic DRM on Ru/MgO or Ru/SiO<sub>2</sub> at different temperatures in the dark or under focused illumination was conducted by using a home-made quartz cylindro-conical reactor as shown in *Supplementary Scheme 3*. The temperature of Ru/MgO or Ru/SiO<sub>2</sub> in the reactor was controlled by a

heating package. 0.007 g of Ru/MgO or Ru/SiO<sub>2</sub> was pre-reduced with 5 vol% H<sub>2</sub>/Ar (30 mL min<sup>-1</sup>) at 500 °C for 0.5 h. After the pre-reduction, the stream of 5 vol% H<sub>2</sub>/Ar was switched to a stream of 10/10/80 vol% CH<sub>4</sub>/CO<sub>2</sub>/Ar at 50 mL min<sup>-1</sup> for catalytic DRM at the different temperatures in the dark or under focused illumination of UV-vis-IR,  $\lambda > 420$  560 and 690 nm vis-IR. The products and reactants were analyzed by gas chromatograph (GC9560).

### **7. CH<sub>4</sub> temperature programmed oxidation by pre-adsorbed CO<sub>2</sub> (CH<sub>4</sub>-TPO-CO<sub>2</sub>)**

CH<sub>4</sub>-TPO-CO<sub>2</sub> on the samples of Ru/MgO or Ru/SiO<sub>2</sub> was performed in the dark or under focused UV-vis-IR illumination using a home-made quartz cylindro-conical reactor with heating device in a circulating air circuit (*Supplementary Scheme S2 and S3 for review only*).<sup>[46]</sup> 0.008 g of Ru/MgO or Ru/SiO<sub>2</sub> was heated to 500 °C at 10 °C min<sup>-1</sup> and kept at 500 °C for 30 min in reducing atmosphere of 5 vol% H<sub>2</sub>/Ar (50 mL min<sup>-1</sup>) purified by a tube of deoxidant. After being cooled to 400 °C, the 5 vol% H<sub>2</sub>/Ar flow was switched to a flow of high purity argon (50 mL min<sup>-1</sup>, purified by a tube of deoxidant) for removing H<sub>2</sub> adsorbed on the sample for 1 h at 400 °C. After cooled to room temperature, the flow of pure argon was switched to a flow of pure CO<sub>2</sub> (50 mL min<sup>-1</sup>) for 30 min to adsorb CO<sub>2</sub>. Then, the CO<sub>2</sub> stream was switched to a flow of high purity argon (50 mL min<sup>-1</sup>, purified by a tube of deoxidant) to remove free and physically adsorbed CO<sub>2</sub>. Finally, the samples (the samples are after pre-sorption of CO<sub>2</sub>) were reacted in the dark or under UV-vis-IR illumination in a circulating gas stream of CH<sub>4</sub> mixture (20 mL CH<sub>4</sub> mixed with 280 mL of argon, purified by a tube of deoxidant) at a heating rate of 10 °C min<sup>-1</sup>. FTIR spectra of the gas composition in the system were recorded.

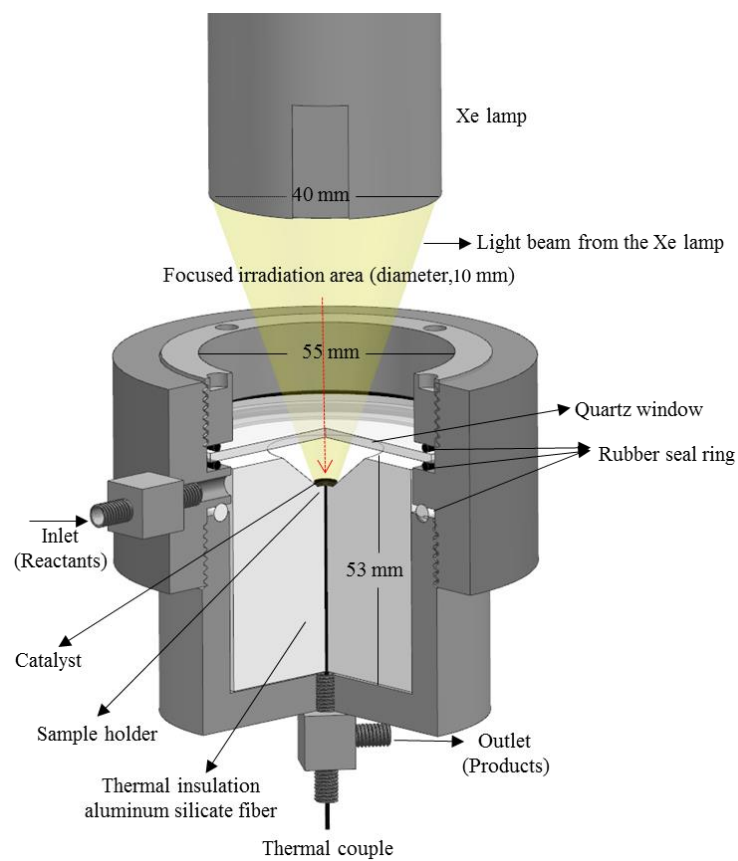

**Scheme S1.** Schematic illustration of a home-made reactor for conducting photothermocatalytic CO<sub>2</sub> reduction by methane on the samples under focused illumination from a 500 W Xe lamp without using additional electric heater (*only for review*).<sup>[40, 46, 50]</sup>

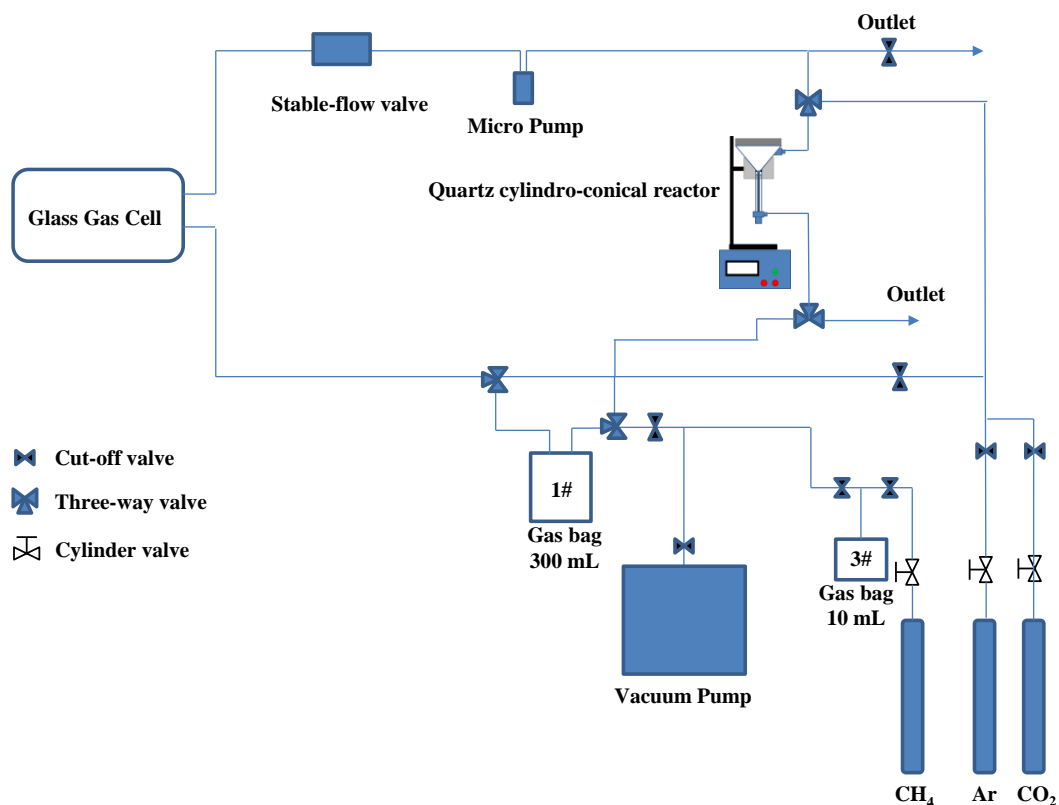

**Scheme S2.** Flow chart of CH<sub>4</sub> temperature programmed oxidation by pre-adsorbed CO<sub>2</sub> (*only for review*).<sup>[46]</sup>

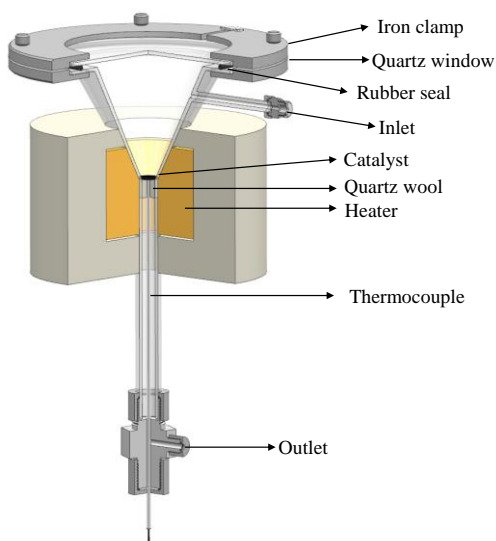

**Scheme S3.** Schematic diagram of a home-made quartz cylindro-conical reactor for catalytic DRM testing of samples at different temperatures in the dark or under focused UV-vis-IR illumination, isotope labelling experiments and CH<sub>4</sub> temperature programmed oxidation by pre-adsorbed CO<sub>2</sub> (*only for review*).<sup>[46]</sup>

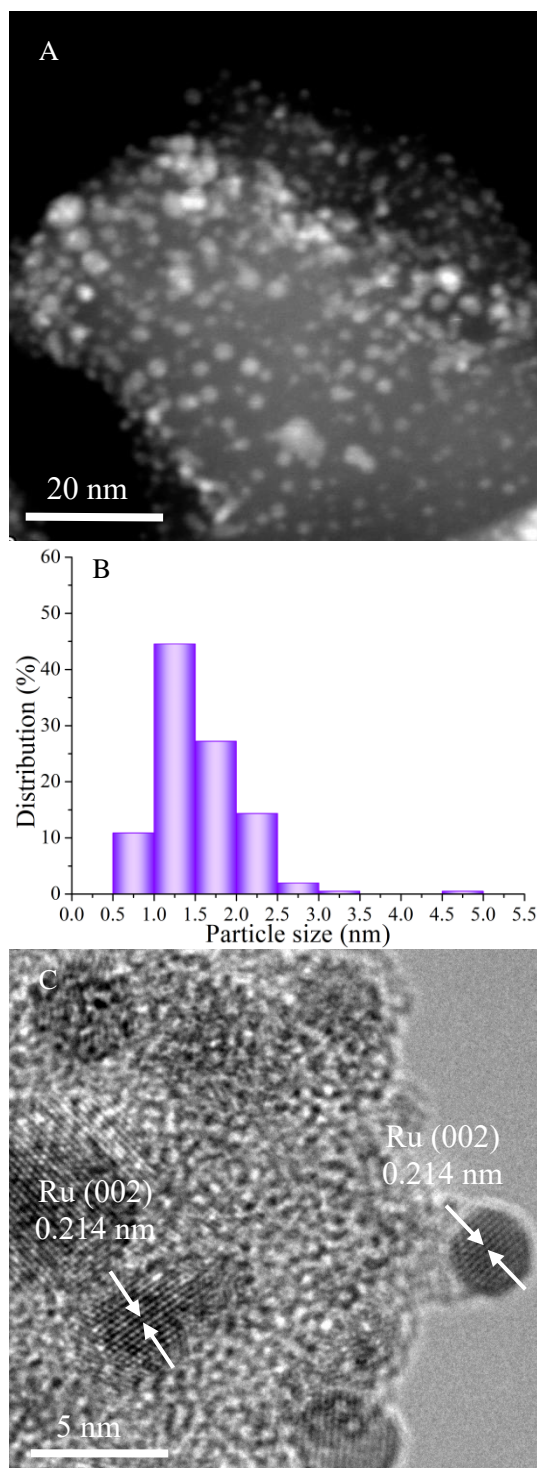

**Figure S1.** HAADF image (A), and size distribution of Ru NPs in Figure S1A (B), and HRTEM image (C) of Ru/SiO<sub>2</sub>.



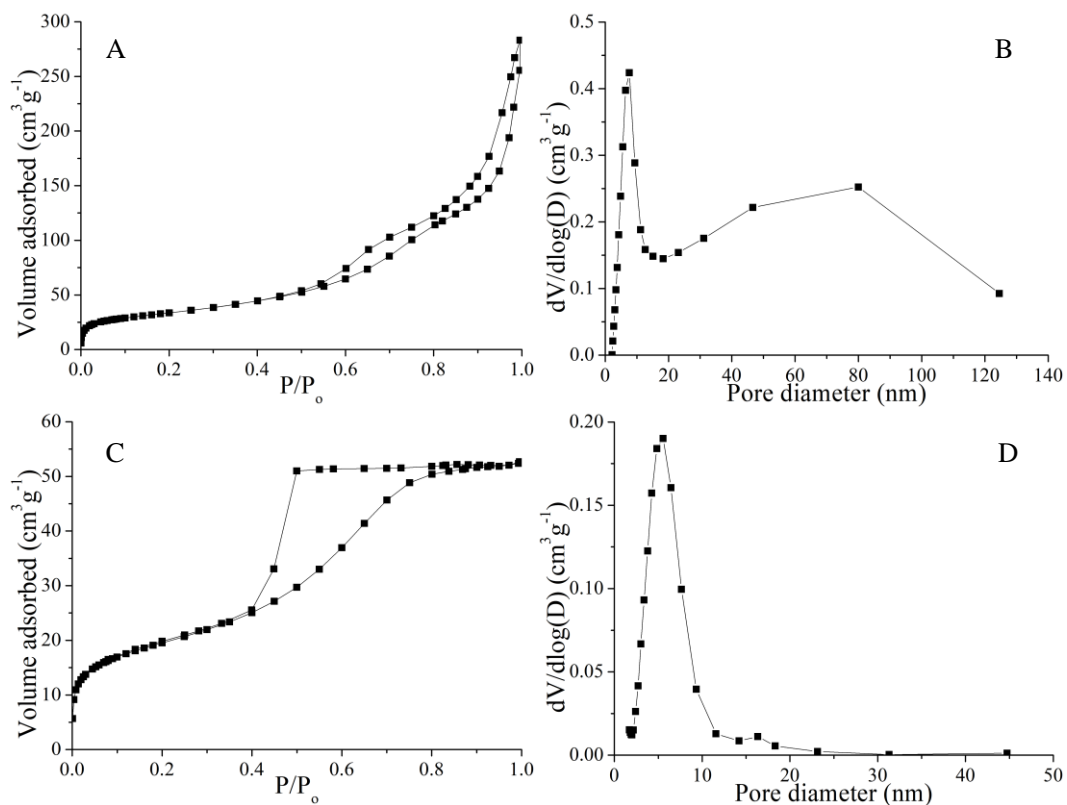

**Figure S2.** N<sub>2</sub> adsorption-desorption isotherm and BJH adsorption pore size distribution of Ru/MgO (A and B) and Ru/SiO<sub>2</sub> (C and D).

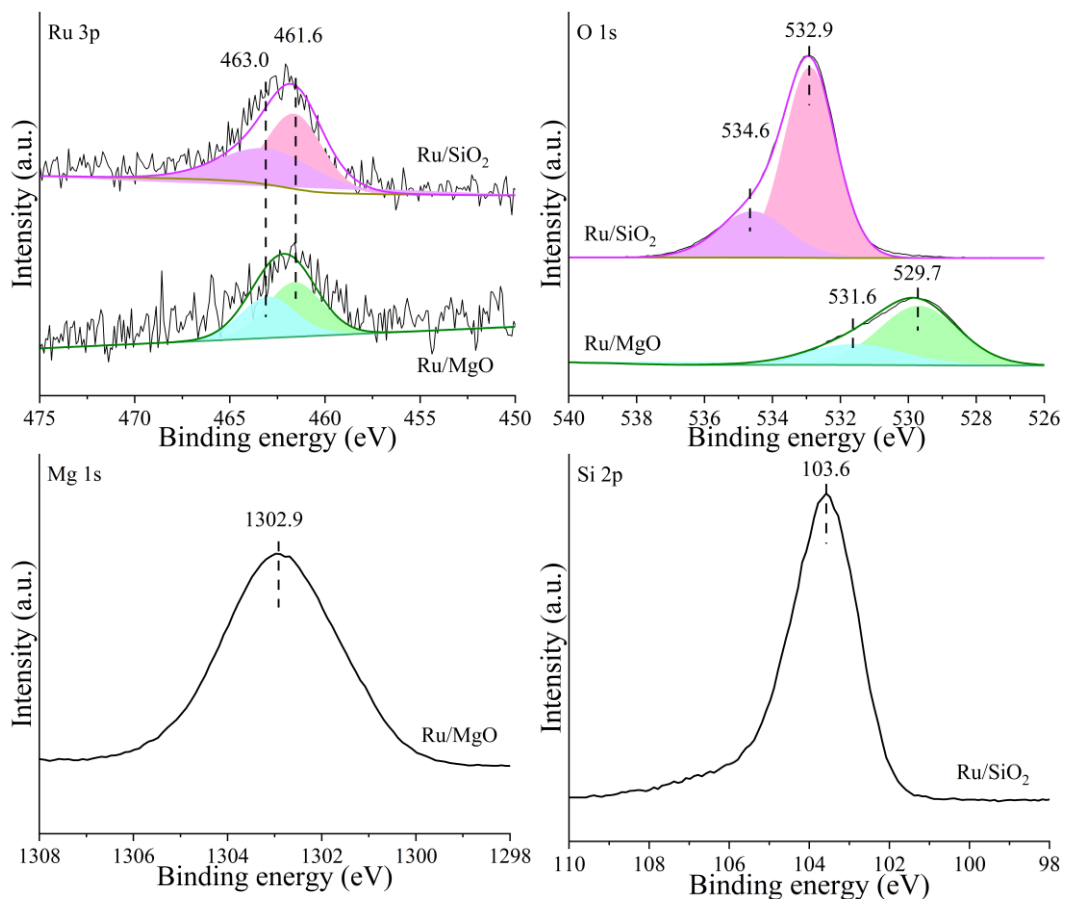

**Figure S3.** XPS spectra of Ru  $3p_{3/2}$ , O  $1s$ , Mg  $1s$  and Si  $2p_{3/2}$  for Ru/MgO and Ru/SiO<sub>2</sub>. Mg  $1s$  peak in Ru/MgO is located around 1302.9 eV, which is assigned to that of Mg<sup>2+</sup> in MgO<sup>[49]</sup> Si  $2p_{3/2}$  peak in Ru/SiO<sub>2</sub> is located around 103.6 eV, which is assigned to that of Si<sup>4+</sup> in SiO<sub>2</sub>.<sup>[49]</sup>

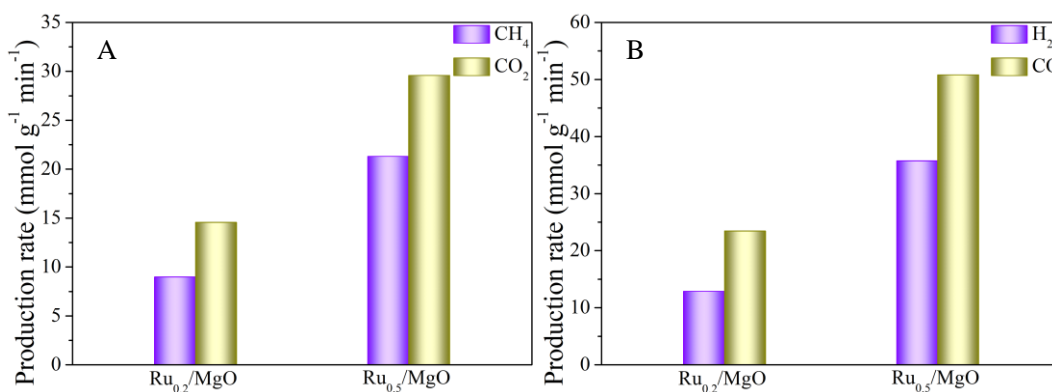

**Figure S4.** The  $r_{CH_4}$  and  $r_{CO_2}$  (A),  $r_{H_2}$  and  $r_{CO}$  (B) for light-driven thermocatalytic DRM on Ru<sub>0.5</sub>/MgO (0.5 wt% Ru/MgO) and Ru<sub>0.2</sub>/MgO (0.2 wt% Ru/MgO) under concentrated UV-vis-IR illumination.

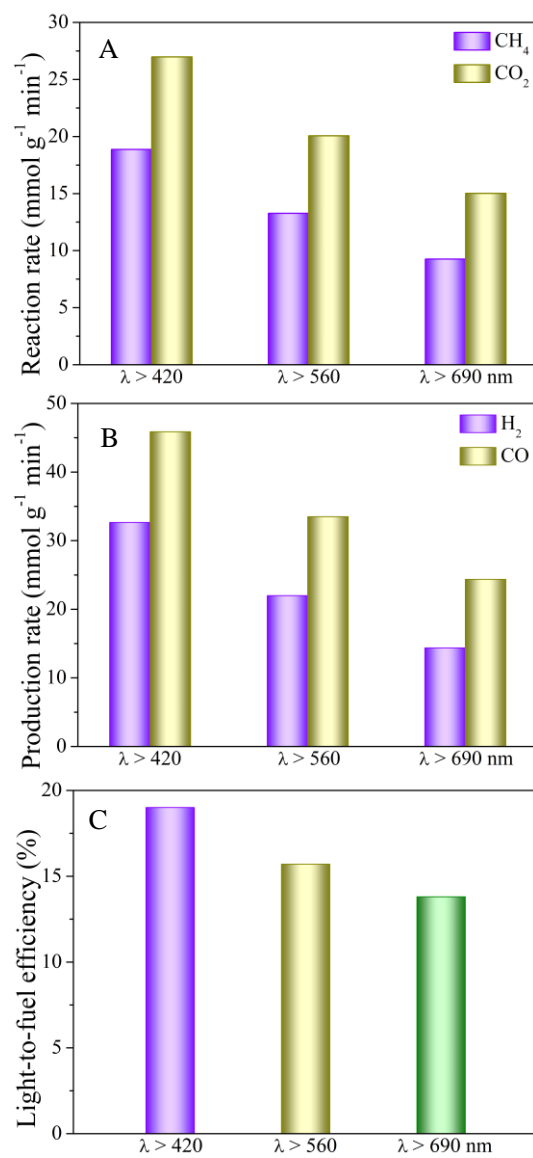

**Figure S5.** Reaction rates (A), production rates (B), and light-to-fuel efficiency (C) of Ru/MgO for photothermocatalytic DRM with concentrated vis-IR irradiation.

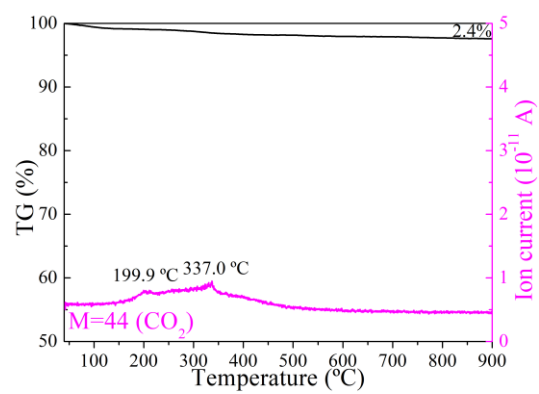

**Figure S6.** TG-MS profiles of the used Ru/SiO<sub>2</sub> catalyst after 10 hours of light-driven thermocatalytic evaluation.

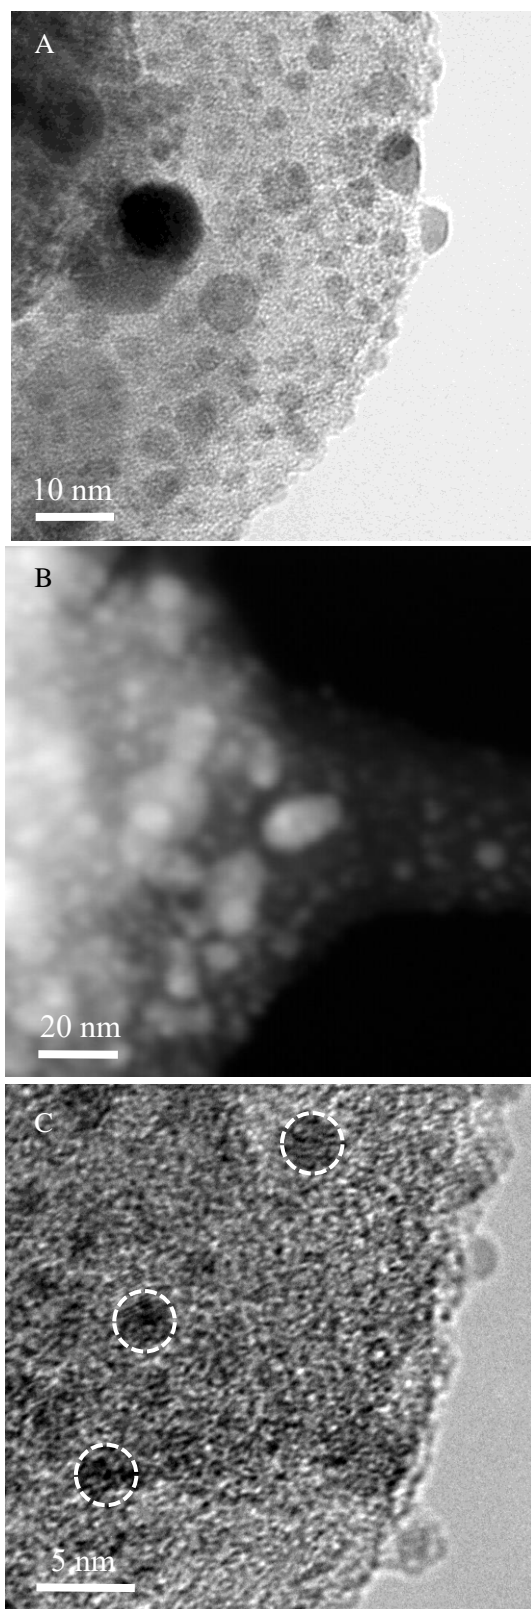

**Figure S7.** TEM (A), HAADF (B) and HRTEM (C) images of the used Ru/SiO<sub>2</sub> catalyst after 10 hours of light-driven thermocatalytic evaluation.

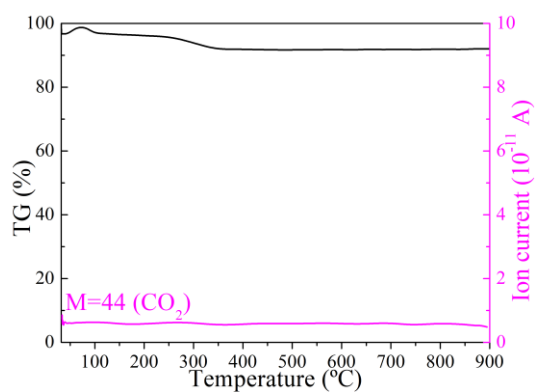

**Figure S8.** TG-MS profiles of the used Ru/MgO catalyst after 50 hours of light-driven thermocatalytic evaluation. The weight loss in the range of 290~350 °C is attributed to the decomposition of Mg(OH)<sub>2</sub> formed on the surface of MgO by the surface hydration of MgO due to the exposure of the Ru/MgO catalyst to air with humidity.

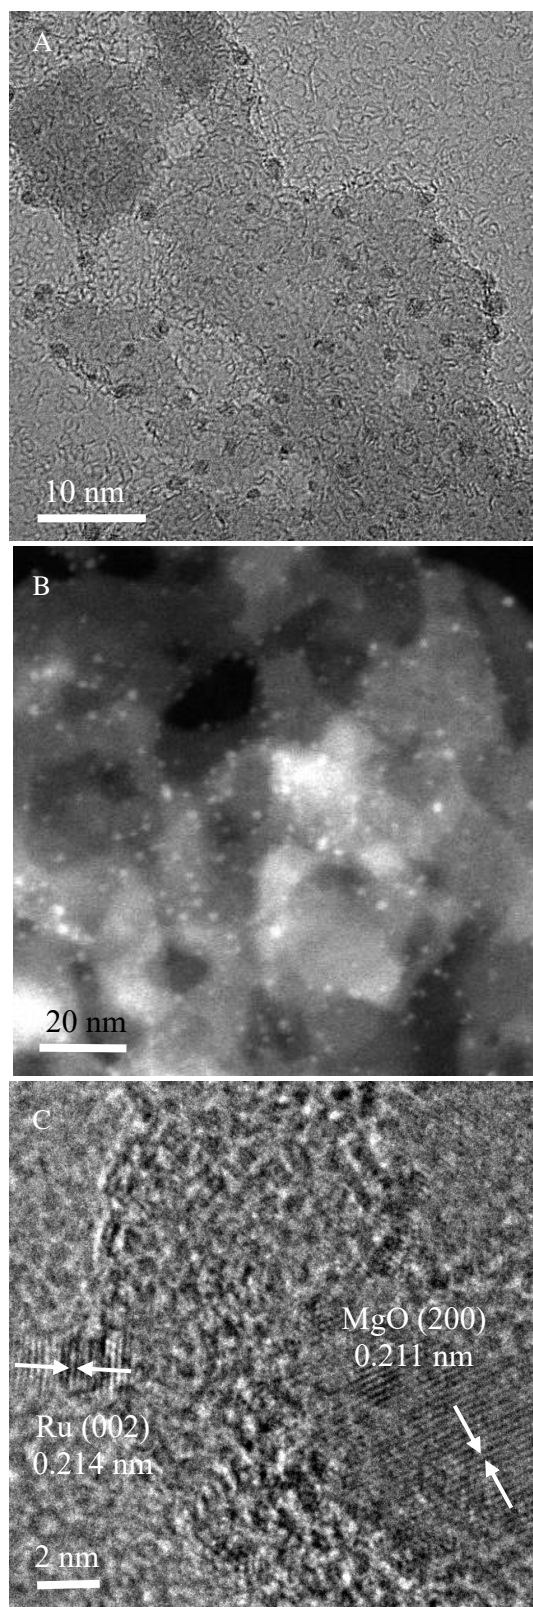

**Figure S9.** TEM (A), HAADF (B) and HRTEM (C) images of the used Ru/MgO catalyst after 50 hours of light-driven thermocatalytic evaluation.

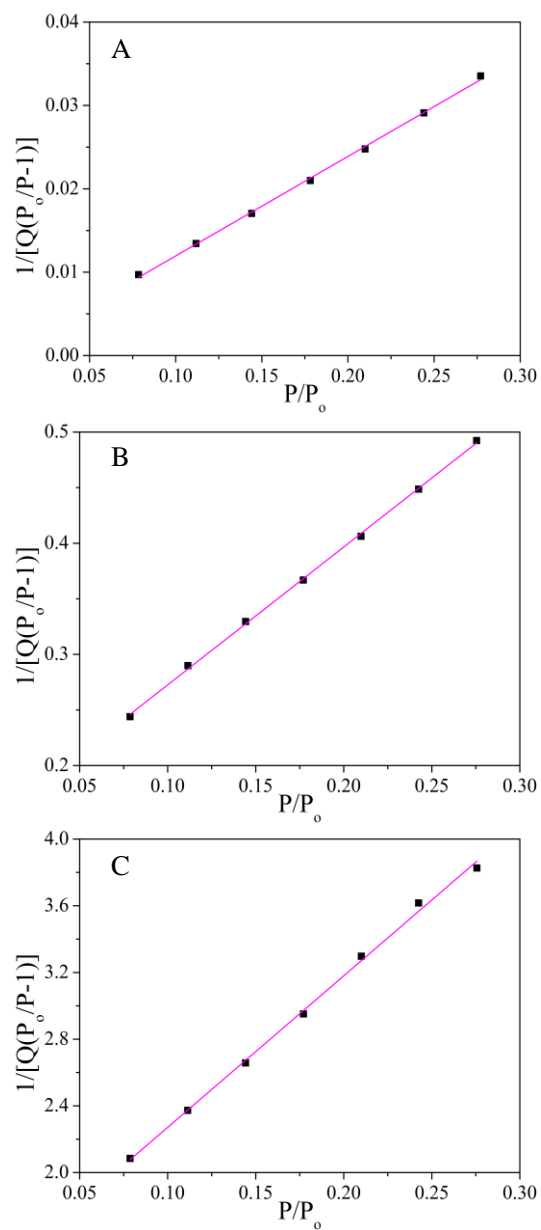

**Figure S10.** The profiles of  $P/P_0$  vs  $1/[Q(P_0/P-1)]$  for Ru/MgO (A), Ru/SiO<sub>2</sub> (B) and SiO<sub>2</sub> (C) based on their CO<sub>2</sub> adsorption isotherms at 0 °C (Figure 4).



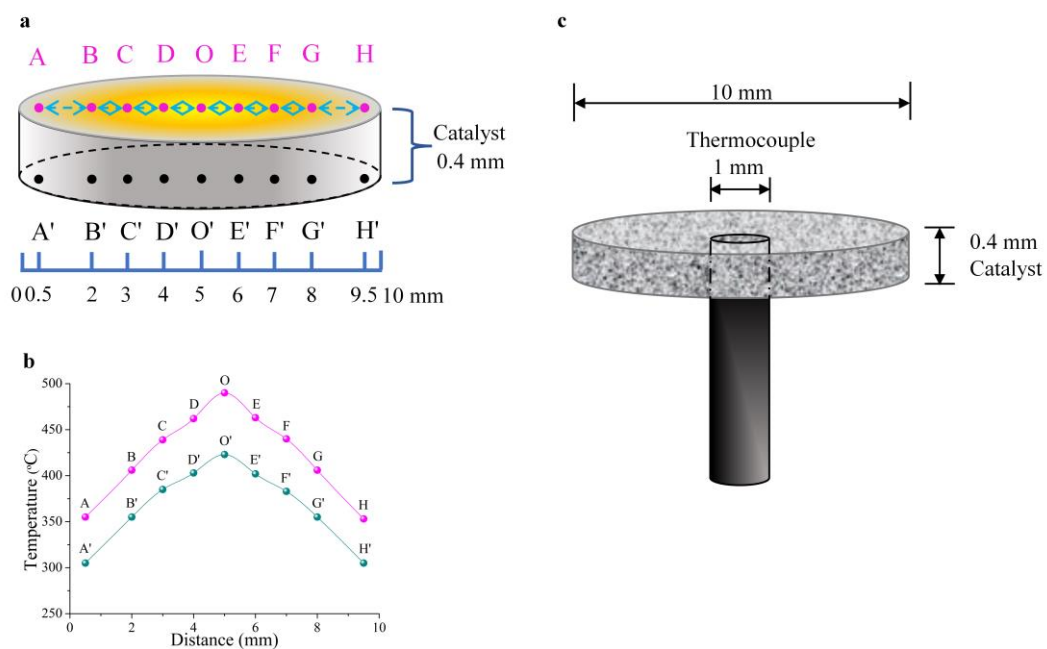

**Figure S11.** Schematic diagram of the temperature of each position of the sample during Ru/MgO photothermocatalytic DRM under concentrated UV-vis-IR illumination (a and b). Schematic diagram of sample thickness and thermocouple position (c).

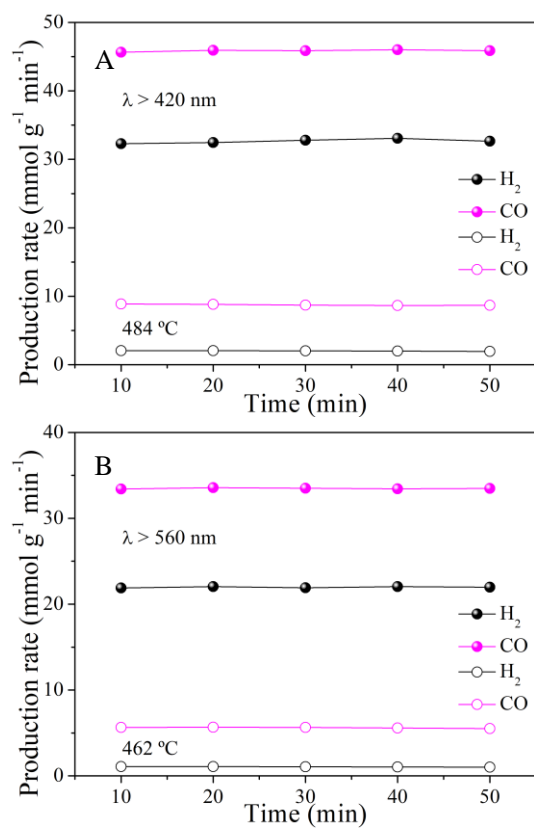

**Figure S12.** Time course of production rates for photothermocatalytic DRM with concentrated vis-IR illumination and thermocatalytic DRM on Ru/MgO at the temperature the same as the maximum  $T_{eq}$  of corresponding photothermocatalytic DRM:  $\lambda > 420$  nm and 484 °C (A),  $\lambda > 560$  nm and 462 °C (B).

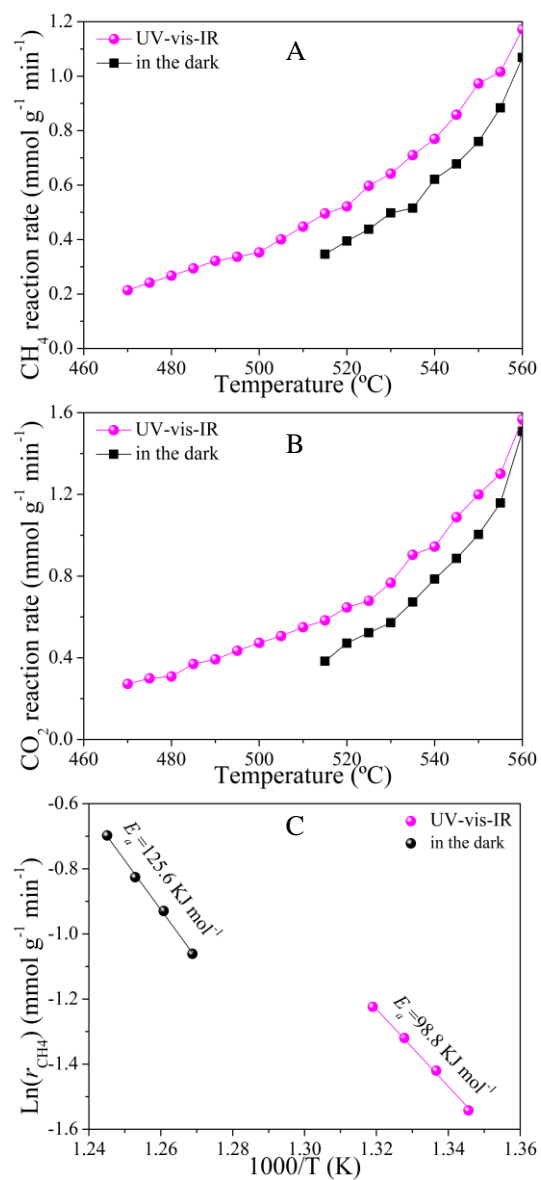

**Figure S13.** The values of  $r_{\text{CH}_4}$  (A) and  $r_{\text{CO}_2}$  (B) vs  $T$ , and  $\ln(r_{\text{CH}_4})$  vs  $1/T$  (C) for DRM on Ru/SiO<sub>2</sub> with concentrated UV-vis-IR illumination and in the dark.

**Table S1:** Comparison of light-driven catalytic DRM activity of various catalysts.

| Catalyst                                                         | Feed composition                                                  | Light intensity (kW m <sup>-2</sup> ) | H <sub>2</sub> production rate (mmol g <sup>-1</sup> min <sup>-1</sup> )* | Light-to-fuel efficiency (%) | Reference |
|------------------------------------------------------------------|-------------------------------------------------------------------|---------------------------------------|---------------------------------------------------------------------------|------------------------------|-----------|
| Ru/MgO                                                           | 30/30/40 vol%<br>CH <sub>4</sub> /CO <sub>2</sub> /Ar             | 73.2                                  | 43.51                                                                     | 19.4                         | This work |
| Pt/black TiO <sub>2</sub>                                        | 50/50 vol%<br>CH <sub>4</sub> /CO <sub>2</sub>                    | 1<br>(heating to 650 °C)              | 2.15                                                                      |                              | 18        |
|                                                                  |                                                                   | 1<br>(heating to 550 °C)              | 1.18                                                                      |                              |           |
| Cu-CNN/Pd-BDCNN                                                  | 10/10/80 vol%<br>CH <sub>4</sub> /CO <sub>2</sub> /Ar             | 3                                     | 0.01                                                                      |                              | 23        |
| Pt/TaN                                                           | 50/50 vol%<br>CH <sub>4</sub> /CO <sub>2</sub>                    | 4.2<br>(heating to 500 °C)            | ~1.1                                                                      |                              | 24        |
| Pt-Si-CeO <sub>2</sub>                                           | 10/10/80 vol%<br>CH <sub>4</sub> /CO <sub>2</sub> /Ar             | 30<br>(heating to 600 °C)             | 1.5                                                                       |                              | 26        |
| Pt/mesoporous-TiO <sub>2</sub>                                   | 10/14/24 vol%<br>CH <sub>4</sub> /CO <sub>2</sub> /N <sub>2</sub> | 32.2<br>(heating to 500 °C)           | 2.98                                                                      |                              | 27        |
| Rh/SrTiO <sub>3</sub>                                            | 1/1/98 vol%<br>CH <sub>4</sub> /CO <sub>2</sub> /Ar               | 0.56                                  | ~0.9                                                                      | 5.9                          | 28        |
| Rh/Ce <sub>x</sub> WO <sub>3</sub>                               | 20/20/60 vol%<br>CH <sub>4</sub> /CO <sub>2</sub> /Ar             | 18                                    | ~0.04                                                                     | ~2.7                         | 43        |
| Pt/Al <sub>2</sub> O <sub>3</sub> -CeO <sub>2</sub>              | 10/10/80 vol%<br>CH <sub>4</sub> /CO <sub>2</sub> /Ar             | 30<br>(heating to 700 °C)             | 10.95                                                                     |                              | 44        |
| Pt/La <sub>2</sub> O <sub>3</sub>                                | 8/8/84 vol%<br>CH <sub>4</sub> /CO <sub>2</sub> /Ar               | 194.2                                 | 21.41                                                                     | 8                            | 45        |
| Cu <sub>19.8</sub> Ru <sub>0.2</sub> (single-Ru atomic catalyst) | 50/50 vol%<br>CH <sub>4</sub> /CO <sub>2</sub>                    | 192<br>~80                            | 33                                                                        | ~15<br>~9                    | 47        |

|                            |                                      |                     |      |      |    |
|----------------------------|--------------------------------------|---------------------|------|------|----|
| MgO/Pt/Zn-CeO <sub>2</sub> | 10/10/80 vol%                        | 30                  | 5.93 |      | 53 |
|                            | CH <sub>4</sub> /CO <sub>2</sub> /Ar | (heating to 600 °C) |      |      |    |
|                            | 10.2/10.2/79.6                       |                     |      |      |    |
| Pt/CeO <sub>2</sub> -MNR   | vol%                                 | 371.1               | 5.70 | 10.3 | 54 |
|                            | CH <sub>4</sub> /CO <sub>2</sub> /Ar |                     |      |      |    |

---

\*: The rate of H<sub>2</sub> production per unit mass of catalyst.
